# Supplementary material for: High frequency of mosaic pathogenic variants in genes causing epilepsy-related neurodevelopmental disorders
Source: PubMed Central journal article supplement (PMC5895461; doi:10.1038/gim.2017.114), 2017-08-24
Supplement: gim2017114x2.pdf [file gim2017114x2.pdf]

**Table S1. Mean coverage (read depth) of genes by various NGS methods**

| <b>Mean coverage (read depth) of NGS methods</b> |                                                     |                           |                           |                         |
|--------------------------------------------------|-----------------------------------------------------|---------------------------|---------------------------|-------------------------|
| <b>Gene</b>                                      | <b>Panel:<br/>Raindance<br/>(multiplex<br/>PCR)</b> | <b>Panel:<br/>Capture</b> | <b>WES V1<br/>(SS V4)</b> | <b>WES V2<br/>(CRE)</b> |
| <i>CDKL5</i>                                     | 640                                                 | 1,070                     | 131                       | 166                     |
| <i>PCDH19</i>                                    | 1,020                                               | 930                       | 176                       | 153                     |
| <i>SCN2A</i>                                     | 1,140                                               | 1,170                     | 102                       | 215                     |
| <i>SCN1A</i>                                     | 1,280                                               | 1,200                     | 99                        | 208                     |
| <i>GABRA1</i>                                    | 670                                                 | 1,430                     | 109                       | 190                     |
| <i>GRIN2B</i>                                    | N/A                                                 | 1,350                     | 160                       | 163                     |
| <i>GABRG2</i>                                    | 630                                                 | 1,460                     | 114                       | 248                     |
| <i>MECP2</i>                                     | 2,020                                               | 880                       | 182                       | 154                     |
| <i>KCNQ2</i>                                     | 1,090                                               | 1,150                     | 91                        | 81                      |

*CRE, Clinical Research Exome; SS V4, SureSelect Human All Exon V4.*
